# Supplementary material
Source: PubMed Central journal article supplement (PMC5543919)
Supplement: jciinsight-2-94821-s001.pdf [file jciinsight-2-94821-s001.pdf]

## Supplemental material

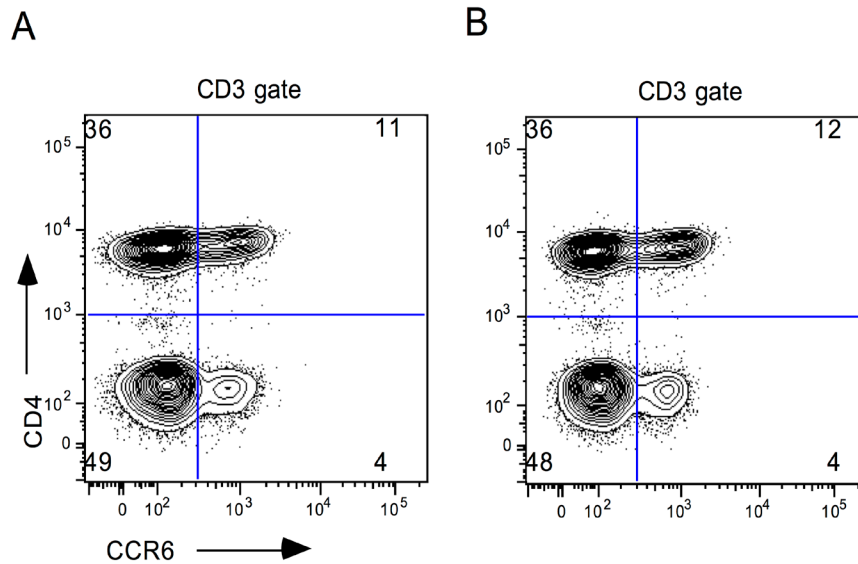

**Supplemental figure 1:** *Staining of human lymphocytes with anti-hCCR6 mAbs.* Human peripheral lymphocytes were stained with CD19-APC; CD3-PE; CD4-Pacific Blue and (A) anti-human CCR6-FITC (clone 29A6) or (B) commercial anti-CCR6-FITC (clone G034E3 from Biolegend). Dead cells were excluded with 7AAD. The FACS plots represented 7AAD<sup>-</sup>; CD19<sup>-</sup>; CD3<sup>+</sup> gate.

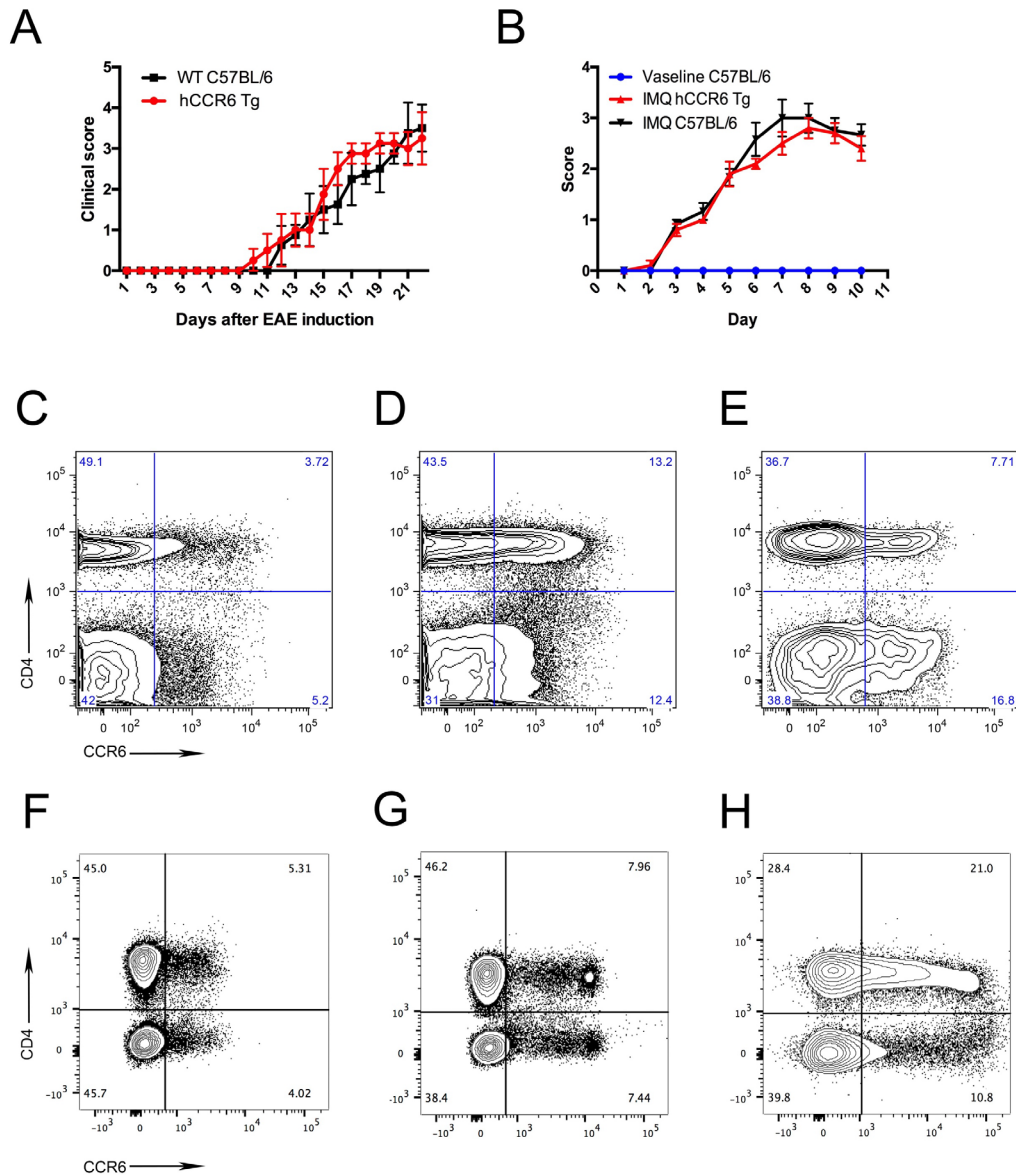

**Supplemental figure 2:** *C57BL/6* and *hCCR6 Tg* mice showed similar disease kinetic in the *rmMOG* induced EAE and *IMQ*-skin inflammation models. (A) *C57BL/6* (Black curve) and *hCCR6 Tg/mCCR6<sup>-/-</sup>* mice (Red curve) were immunized with *rmMOG* and disease score were monitor daily other 3-weeks. (B) *IMQ*-skin inflammation was induced in *C57BL/6* (Black curve) and *hCCR6 Tg/mCCR6<sup>-/-</sup>* mice (Red curve). Skin thickness was monitor daily other 10 days and compare with control *hCCR6 Tg/mCCR6<sup>-/-</sup>* mice treated with Vaseline cream (Blue curve). *IMQ* and *rmMOG* induced expression of *hCCR6* on T-cells. T-cells from peripheral lymph nodes (C; D; E) and spleens (F; G ;H) from untreated *hCCR6 Tg/mCCR6<sup>-/-</sup>* mice (C; F); *hCCR6 Tg* mice treated with *IMQ* (D; G) and *hCCR6 Tg* mice immunized with *rmMOG* (E; H) were stained with anti-B220-APC; anti-CD4-Pacific Blue; anti-CD3-PE, anti-CD8-PeCy7, anti-*hCCR6*-FITC (clone 29A6) and 7AAD. FACS plot represent lymphocytes population in the 7AAD<sup>+</sup>; B220<sup>+</sup>; CD3<sup>+</sup> gate.
